# Supplementary material for: Ethanol Extract of Centipeda minima Exerts Antioxidant and Neuroprotective Effects via Activation of the Nrf2 Signaling Pathway
Source: PubMed Central journal article supplement (PMC6470452; doi:10.1155/2019/9421037), 2019-04-03
Supplement: 9421037.f1.pdf [file 9421037.f1.pdf]

## Supplementary Materials

### **Ethanol extract of *Centipeda minima* exerts antioxidant and neuroprotective effects via activation of Nrf2 signaling**

Yi-Jie Wang<sup>1#</sup>, Xin-Yue Wang<sup>3#</sup>, Xu-Yi Hao<sup>1</sup>, Yong-Ming Yan<sup>2</sup>, Ming Hong<sup>1</sup>,  
Su-Fen Wei<sup>1</sup>, Yi-Le Zhou<sup>1</sup>, Qi Wang<sup>1\*</sup>, Yong-Xian Cheng<sup>2\*</sup>, Yong-Qiang Liu<sup>1\*</sup>

<sup>1</sup>Institute of Clinical Pharmacology, Guangzhou University of Chinese Medicine,  
Guangzhou 510405, PR China

<sup>2</sup>School of Pharmaceutical Sciences, Shenzhen University Health Science Center,  
Shenzhen 518060, PR China

<sup>3</sup>Sun Yat-sen University Cancer Center, Guangzhou 510060, PR China

#These authors have contributed equally to this work

\*Correspondence should be addressed to Yong-Qiang Liu; liuyq@gzucm.edu.cn;

Yong-Xian Cheng: yxcheng@szu.edu.cn; Qi Wang; wangqi@gzucm.edu.cn.

## **Supplementary Materials and Methods**

### **Hematoxylin-eosin (H&E) staining**

At the end of animal experiments, mice were anesthetized and perfused with ice-cold PBS and 4% paraformaldehyde. In brief, sagittal sections at 10  $\mu\text{m}$  were prepared by using a Leica ultra-thin semiautomatic microtome as previously described after tissue dehydration. Brain paraffin sections were washed in xylene and rehydrated through a graded series of ethanol and double-distilled water. Then the sections were dipped in hematoxylin staining (Beyotime, Shanghai, China) for 10 min and eosin staining (Beyotime, Shanghai, China) for 1 min at room temperature. Then slides were rinsed in double-distilled water and dehydrated through 80%, 90% and 100% alcohol, cleared in xylene. Images were analyzed by using a light microscope and LEICA QWin Plus (Leica Microsystems, Wetzlar, Germany).

### **Extraction and isolation of EBSC-26A–EBSC-26D**

The air-dried and powdered *Centipeda minima* whole plants (60 kg) were extracted by refluxing with 70% EtOH ( $3 \times 120 \text{ L} \times 2 \text{ h}$ ) to give a crude extract, which was suspended in water followed by extraction with EtOAc to afford an EtOAc soluble extract. The EtOAc extract was suspended in petroleum ether/MeOH (1:1) to afford the MeOH extract. The MeOH partition was applied to a silica gel (200-300 mesh) column, eluted with petroleum ether-EtOAc (10:1-0:1 gradient system), to give fractions A to F. Fraction B was divided into eight portions (B1–B8) by MCI gel CHP 20P eluted with gradient aqueous MeOH

(30%–70%). Fraction B6 was subjected to a RP-18 column (MeOH/H<sub>2</sub>O, 40%–70%) to provide six portions (B6.1–B6.6) monitored by TLC using previously purified EBSC-26A as a reference compound. Fraction B6.3 was recrystallized to afford EBSC-26A (30.0 g, content 2.5%). Fraction B6.4 was further purified using preparative HPLC (MeOH/H<sub>2</sub>O, 65%) to yield EBSC-26A (3.0 g), EBSC-26B (2.0 g, content 0.7%), EBSC-26C (0.8 g), and EBSC-26D (0.6 g).

**EBSC-26A**, white solids, ESIMS:  $m/z$  369 [M + Na]<sup>+</sup>; <sup>1</sup>H NMR (600 MHz, CDCl<sub>3</sub>), see Supplementary Figure 2; <sup>13</sup>C NMR (150 MHz, CDCl<sub>3</sub>), see Supplementary Figure 3.

**EBSC-26B**, white solids, ESIMS:  $m/z$  355 [M + Na]<sup>+</sup>; <sup>1</sup>H NMR (600 MHz, CDCl<sub>3</sub>), see Supplementary Figure 4; <sup>13</sup>C NMR (150 MHz, CDCl<sub>3</sub>), see Supplementary Figure 5.

**EBSC-26C**, white solids, ESIMS:  $m/z$  357 [M + Na]<sup>+</sup>; <sup>1</sup>H NMR (600 MHz, CDCl<sub>3</sub>), see Supplementary Figure 6; <sup>13</sup>C NMR (150 MHz, CDCl<sub>3</sub>), see Supplementary Figure 7.

**EBSC-26D**, white solids, ESIMS:  $m/z$  369 [M + Na]<sup>+</sup>; <sup>1</sup>H NMR (600 MHz, CDCl<sub>3</sub>), see Supplementary Figure 8; <sup>13</sup>C NMR (150 MHz, CDCl<sub>3</sub>), see Supplementary Figure 9.

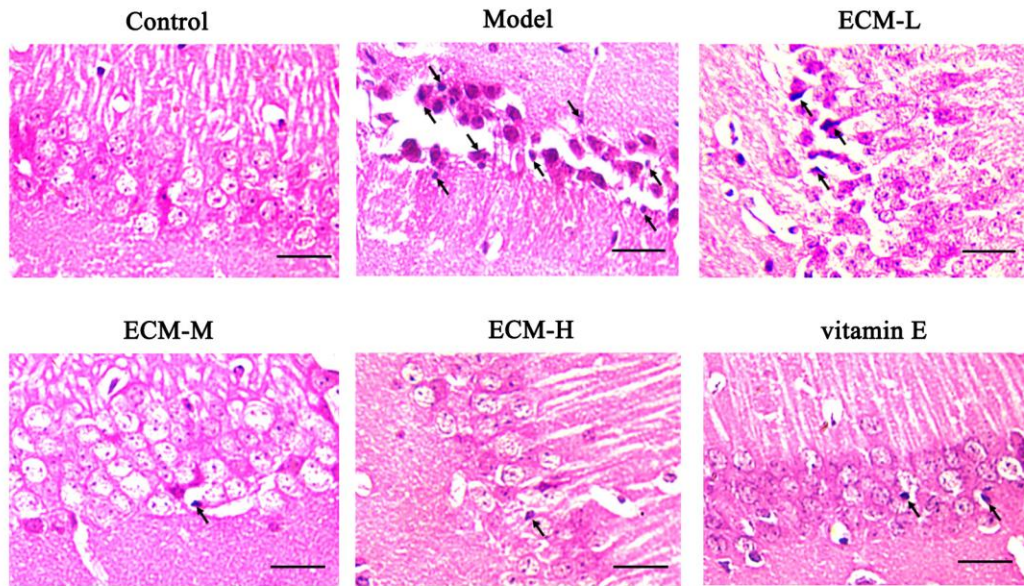

**Supplementary Figure 1. ECM exerts neuroprotective effects in the hippocampus.**

H&E staining show morphological changes of neurons in the hippocampus.

Scale bar, 25  $\mu$ m. Control: vehicle control; ECM-L: D-gal/ $\text{AlCl}_3$  + ECM (100 mg/kg/d); ECM-M: D-gal/ $\text{AlCl}_3$  + ECM (200 mg/kg/d); ECM-H: D-gal/ $\text{AlCl}_3$  + ECM (400 mg/kg/d); vitamin E: D-gal/ $\text{AlCl}_3$  + vitamin E (80 mg/kg/d).

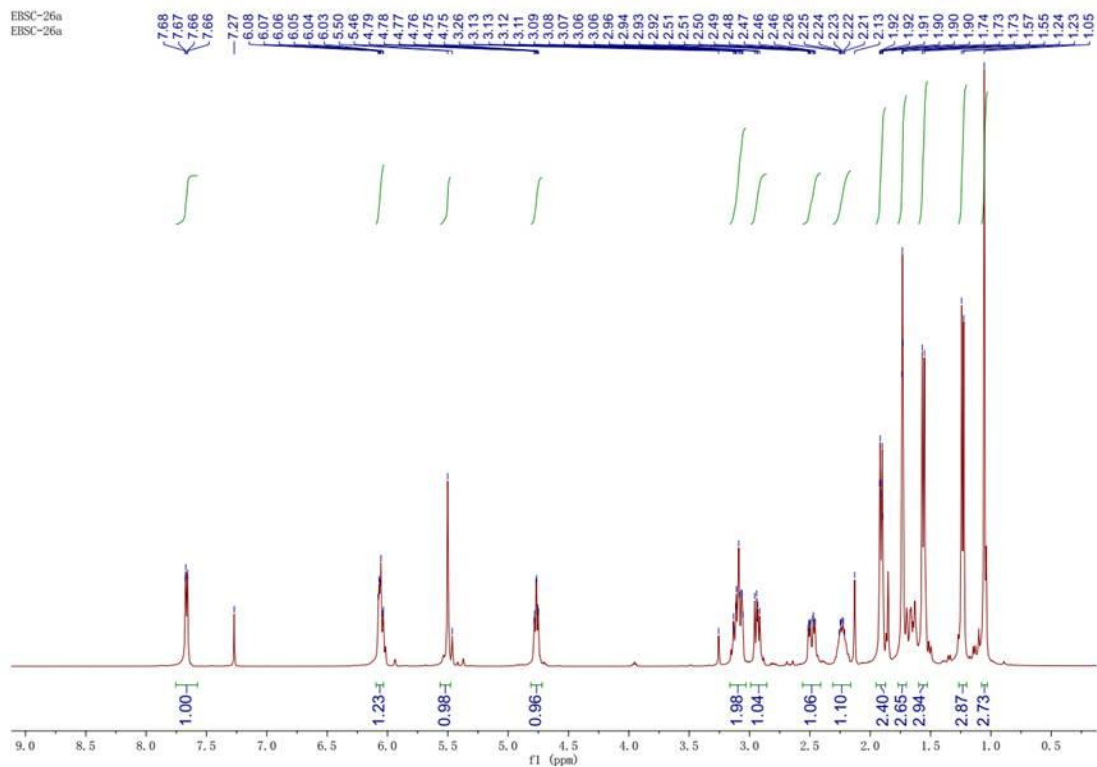

Supplementary Figure 2.  $^1\text{H}$  NMR spectrum of EBSC-26A in  $\text{CDCl}_3$ .

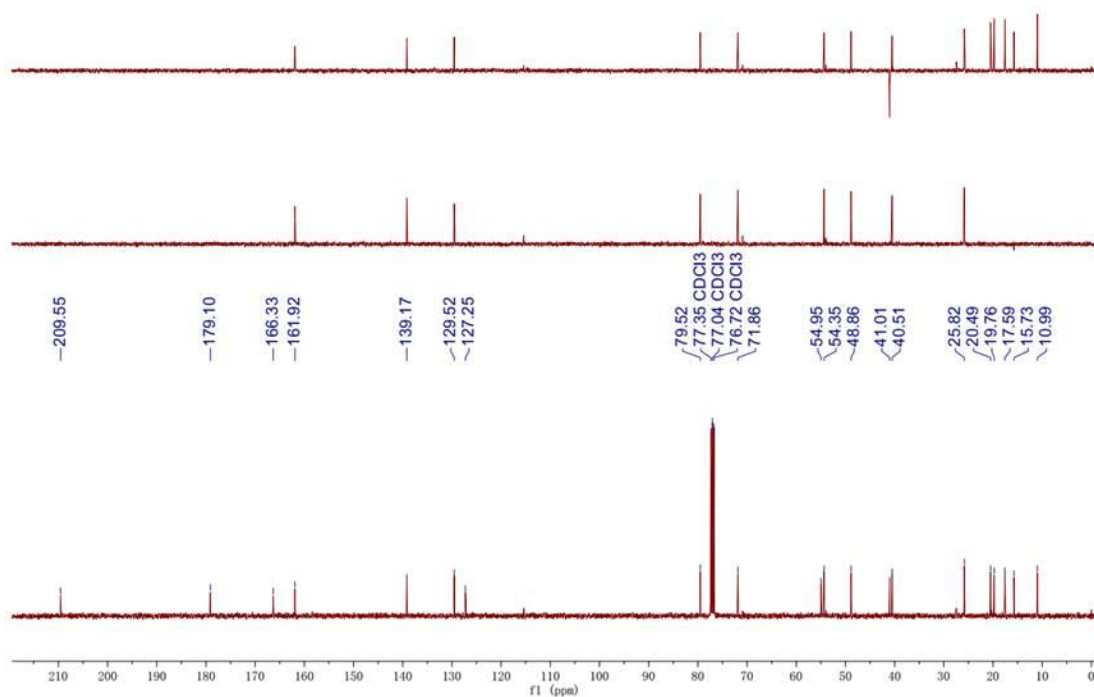

Supplementary Figure 3.  $^{13}\text{C}$  NMR and DEPT spectra of EBSC-26A in  $\text{CDCl}_3$ .

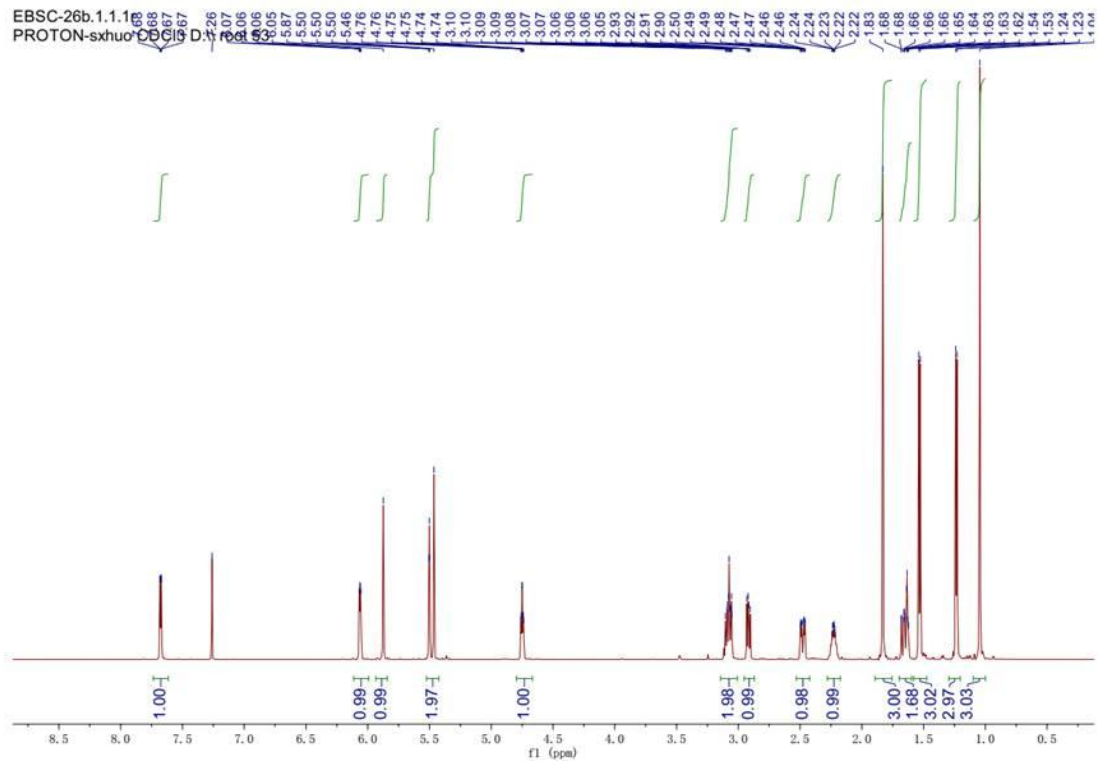

Supplementary Figure 4.  $^1\text{H}$  NMR spectrum of **EBSC-26B** in  $\text{CDCl}_3$ .

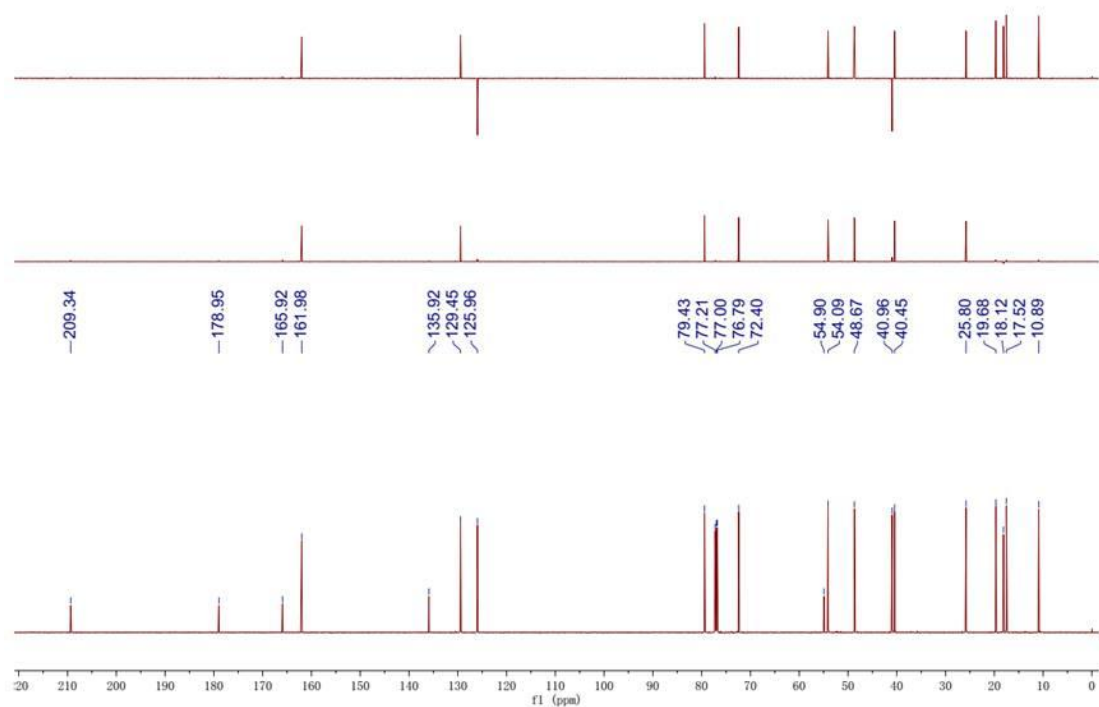

Supplementary Figure 5.  $^{13}\text{C}$  NMR and DEPT spectra of **EBSC-26B** in  $\text{CDCl}_3$ .

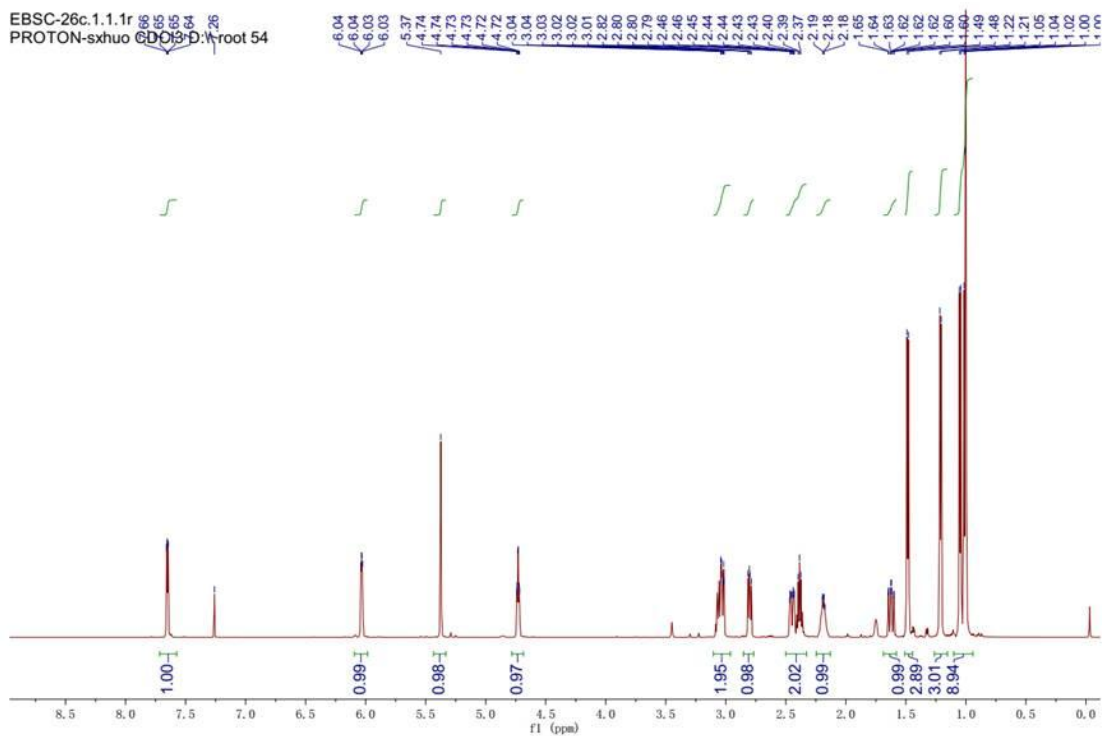

Supplementary Figure 6.  $^1\text{H}$  NMR spectrum of EBSC-26C in  $\text{CDCl}_3$ .

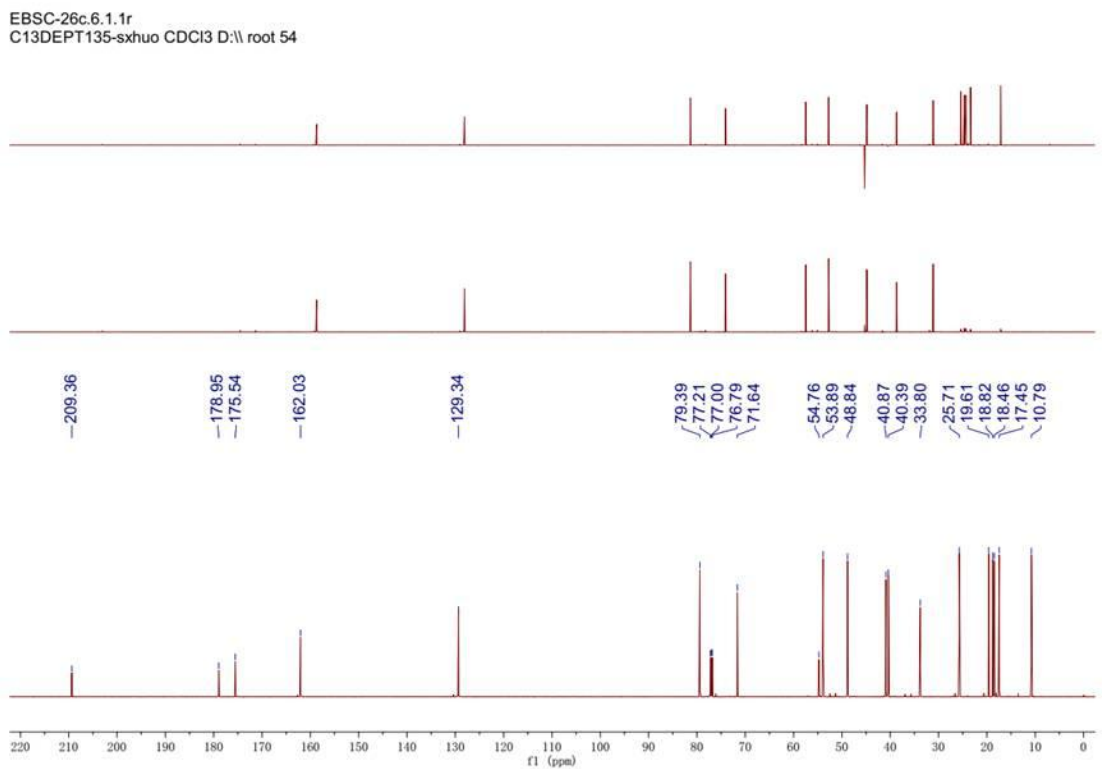

Supplementary Figure 7.  $^{13}\text{C}$  NMR and DEPT spectra of EBSC-26C in  $\text{CDCl}_3$ .

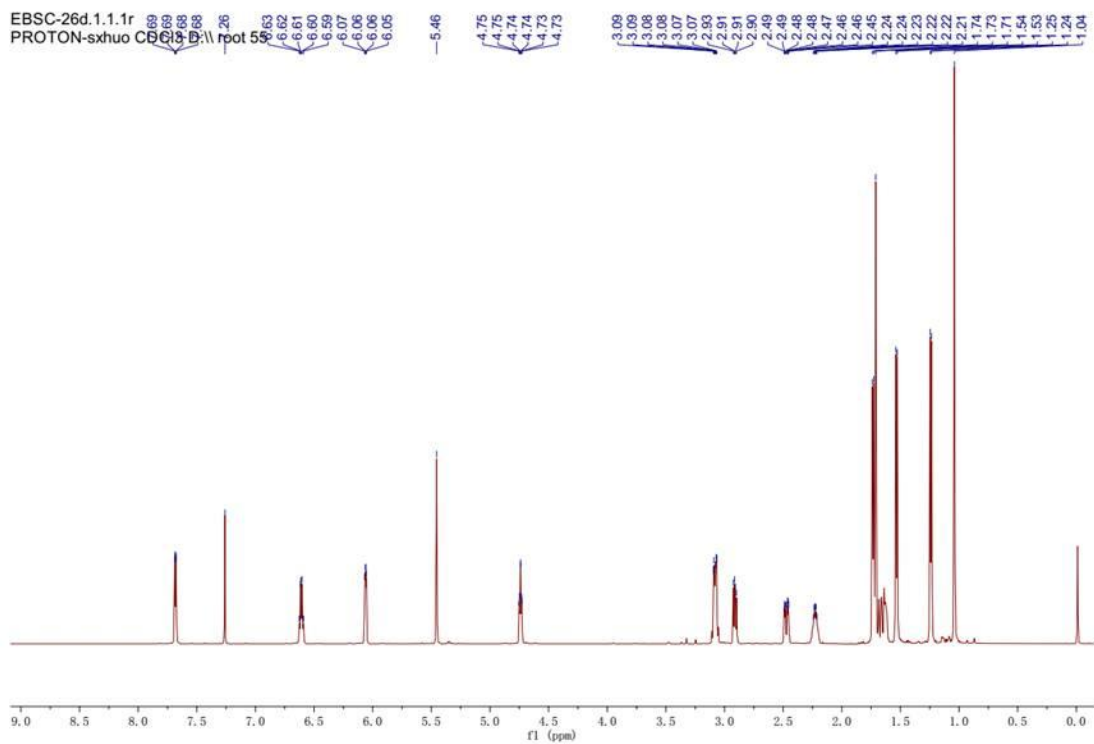

**Supplementary Figure 8.**  $^1\text{H}$  NMR spectrum of **EBSC-26D** in  $\text{CDCl}_3$ .

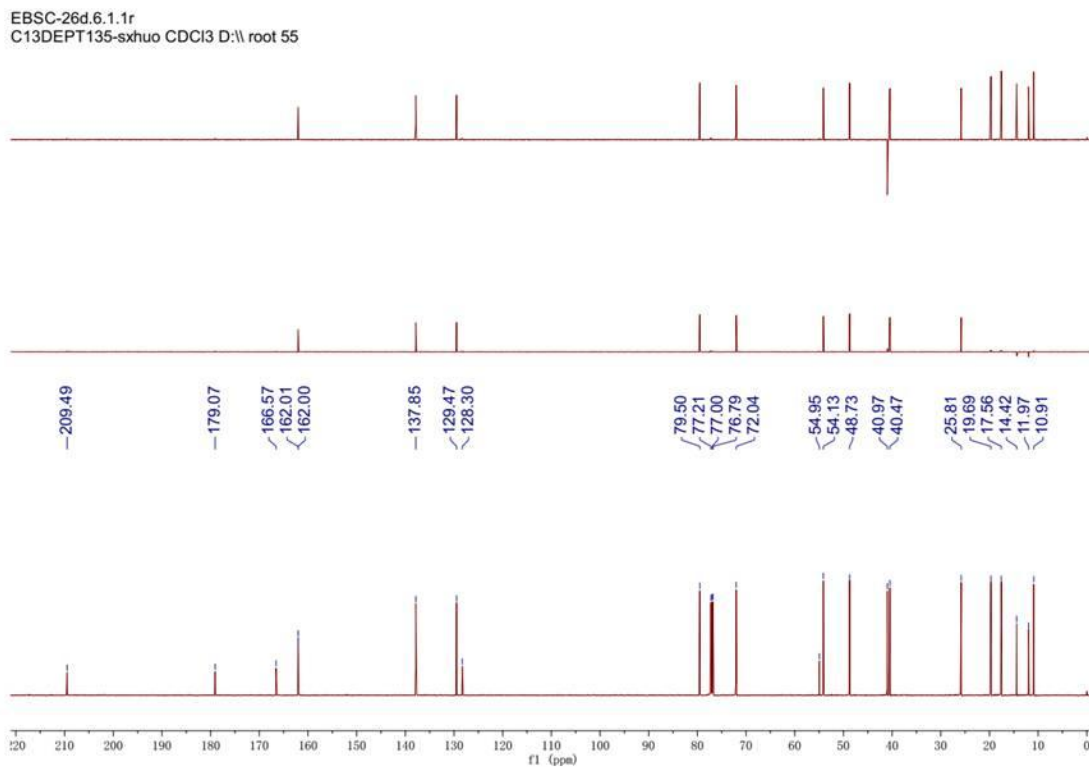

**Supplementary Figure 9.**  $^{13}\text{C}$  NMR and DEPT spectra of **EBSC-26D** in  $\text{CDCl}_3$ .
